# Supplementary material for: Immune Priming Triggers Cell Wall Remodeling and Increased Resistance to Halo Blight Disease in Common Bean
Source: MDPI journal article supplement (doi:10.3390/plants10081514), 2021-07-23
Supplement: s1 [file s1]

# Supplementary figure

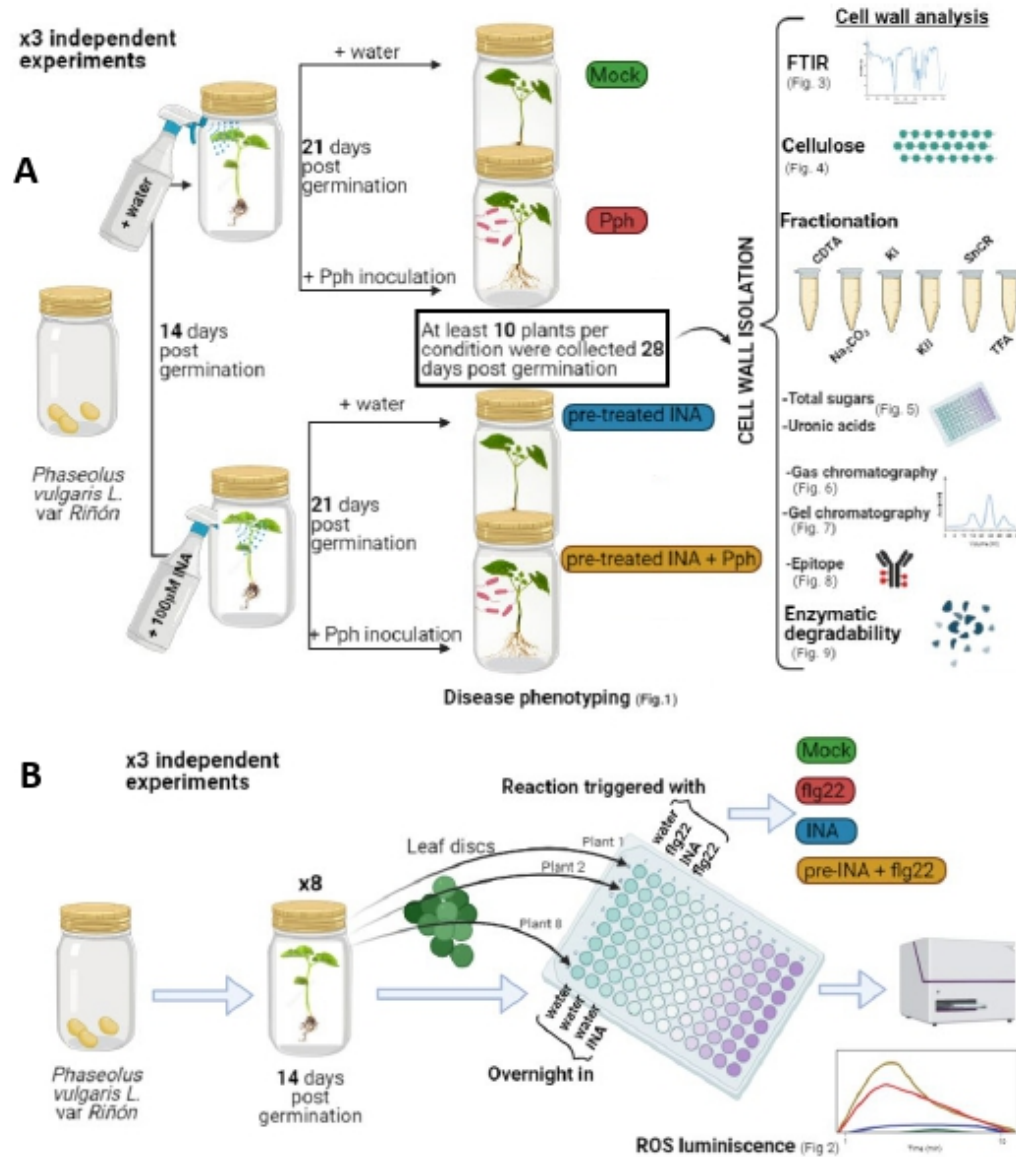

**Figure S1.** Experimental design. (A) Seeds of common bean *P. vulgaris* L. cultivar Riñón were grown *in vitro*. Leaves from common bean plants at V1 stage were sprayed with 2 mL of 100  $\mu$ M INA (INA condition) per leaf or with sterilized water (Mock condition). After 7 days, some plants previously treated or not with INA were sprayed with 2 mL of the Pph solution on foliage leaves, resulting in INA + Pph and Mock + Pph treatments. All plants were grown for 7 days more and then, the foliage leaves of 10 plants per treatment were collected. The experiment was repeated three independent times ( $n=3$ ). Afterwards, CWs were isolated, fractionated and their components analyzed by means of different techniques. (B) The ROS production was determined in V1 plants leaf discs. The reactions were triggered by adding 100  $\mu$ L water (Mock condition) as negative control, 100  $\mu$ L 200  $\mu$ M INA (INA condition) as negative control for toxicity, 100  $\mu$ L 2  $\mu$ M flg22 (flg22 condition) as positive control, and also 100  $\mu$ L 2  $\mu$ M flg22 to those disks previously incubated overnight with 100  $\mu$ M INA (preINA+flg22) as experimental condition. The experiment, with 8 plants assayed, was repeated three independent times ( $n=3$ ).
